# Supplementary material for: The coexistence of interconnected and interweaved double helices in an octamolybdate-based compound: synthesis, structure, and photocatalytic properties
Source: Royal Society of Chemistry journal article supplement (doi:10.1039/c4dt02106a), 2014-01-01
Supplement: c4dt02106a1.pdf [file c4dt02106a1.pdf]

Electric Supplemental Information for:

**Coexistence of Interconnected and Interweaved Double Helixes  
in an Octamolybdate-based Compound: Synthesis, Structure,  
and Photocatalytic Properties†**

**Wenlong Sun, Chunjing Zhang, Huiyuan Ma\*, Haijun Pang\* and Shaobin Li**

**Table of contents:**

1. **Table S1.** Summarization of known double helical compounds based on POMs towards a specific disposition in I and/or II types.
2. **Fig. S1.** View of the helical channels in **1**: (a) the channels formed by a pair of interweaved right- and left-handed helical chains and (b) the channels formed by a pair of interconnected right- and left-handed helical chains.
3. **Fig. S2.** Detailed view of the  $\pi \cdots \pi$  interactions in the inorganic-organic supramolecular layer.
4. **Fig. S3.** The 3D topology of the network for **1**. Color code:  $\{\beta\text{-Mo}_8\text{O}_{26}\}$ , purple;  $\{\text{Cu}(\text{H}_2\text{O})\text{N}_2\text{O}_3\}$  octahedron, green.
5. **Fig. S4.** IR spectrum of **1**.
6. **Fig. S5.** Output of a calculated powder X-ray patterns by *POWDER CELL*.

**Table S1** Summarization of known double helical compounds based on POMs towards a specific disposition in I and/or II types.

| Compounds and structures                                                                                                                                                                                                                                          | types | References                                                                                |
|-------------------------------------------------------------------------------------------------------------------------------------------------------------------------------------------------------------------------------------------------------------------|-------|-------------------------------------------------------------------------------------------|
| 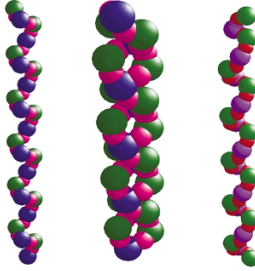 <p><math>[\text{Cu}_2\text{Mo}_2\text{O}_8(4,4\text{-bpy})]_n \cdot 3n\text{H}_2\text{O}</math></p>                                                                             | I     | <p><i>Lu et al.</i><br/> <b>Chem. Commun.</b><br/>           2002, 152–153</p>            |
|  <p><math>[\text{NH}_4][\text{Mo}_2\text{O}_4\text{Gd}(\text{H}_2\text{O})_6(\text{L-C}_4\text{H}_2\text{O}_6)_2] \cdot 4\text{H}_2\text{O}</math></p>                          | I     | <p><i>Lu et al.</i><br/> <b>Chem. Commun.</b><br/>           2003, 1284–1285</p>          |
|  <p><math>\{\text{A}[\text{Mo}_2^{\text{VI}}\text{O}_4\text{Ln}^{\text{III}}(\text{H}_2\text{O})_6(\text{C}_4\text{H}_2\text{O}_6)_2] \cdot 4\text{H}_2\text{O}\}_n</math></p> | I     | <p><i>Lu et al.</i><br/> <b>Dalton Trans.</b><br/>           2003, 3192–3198</p>          |
|  <p><math>[\{\text{Co}^{\text{III}}(\text{phen})_2\}_2\text{V}_8\text{O}_{23}]</math></p>                                                                                      | I     | <p><i>Wang et al.</i><br/> <b>Eur. J. Inorg. Chem.</b><br/>           2004, 1385–1388</p> |
|  <p><math>[\{\text{Zn}(2,2\text{-bpy})\}_2\text{V}_8\text{O}_{21}]</math></p>                                                                                                  | I     | <p><i>Wang et al.</i><br/> <b>J. Mol. Struct.</b><br/>           2004, 691,123–131</p>    |

|                                                                                                                                                                                                                                                                                                                                                                |   |                                                                                 |
|----------------------------------------------------------------------------------------------------------------------------------------------------------------------------------------------------------------------------------------------------------------------------------------------------------------------------------------------------------------|---|---------------------------------------------------------------------------------|
| 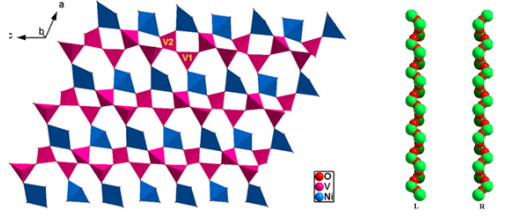 <p>[Ni(phen)H<sub>2</sub>O][V<sub>2</sub>O<sub>6</sub>]</p>                                                                                                                                                                                                                  | I | <p><i>Wang et al.</i><br/><b>J.Mol.Struct.</b><br/>2007,840, 53–58</p>          |
|  <p>[(C<sub>6</sub>H<sub>5</sub>NO<sub>2</sub>)Ln(H<sub>2</sub>O)<sub>5</sub>]<sub>2</sub>[H<sub>2</sub>W<sub>12</sub>O<sub>40</sub>]<sub>2</sub>·nH<sub>2</sub>O</p>                                                                                                         | I | <p><i>Chen et al.</i><br/><b>Inorg. Chim. Acta</b><br/>2008, 361, 2508-2514</p> |
|  <p>Na[Ag<sub>6</sub>(pyttz)<sub>2</sub>(H<sub>2</sub>O)][PMo<sub>12</sub>O<sub>40</sub>]</p>                                                                                                                                                                                | I | <p><i>Yan et al.</i><br/><b>Dalton Trans.</b><br/>2013, 42, 7803–7809</p>       |
|  <p>K[Ag<sub>14</sub>(pyttz)<sub>4</sub>(H<sub>2</sub>O)<sub>4</sub>][HSiW<sub>12</sub>O<sub>40</sub>]<sub>2</sub>·H<sub>2</sub>O<br/>K[Ag<sub>14</sub>(pyttz)<sub>4</sub>(H<sub>2</sub>O)<sub>2</sub>][PW<sub>12</sub>O<sub>40</sub>]<sub>2</sub>·(OH)·5H<sub>2</sub>O</p> | I | <p><i>Yan et al.</i><br/><b>Chem. Asian J.</b><br/>2013, 8, 2254–2261</p>       |
|  <p>[Co(bimb)V<sub>2</sub>O<sub>6</sub>]</p>                                                                                                                                                                                                                                | I | <p><i>Ma et al.</i><br/><b>Inorg. Chem.</b><br/>2014, 53, 4541–4547</p>         |

|                                                                                                                                                                                                                                                                                                                  |    |                                                                                         |
|------------------------------------------------------------------------------------------------------------------------------------------------------------------------------------------------------------------------------------------------------------------------------------------------------------------|----|-----------------------------------------------------------------------------------------|
| 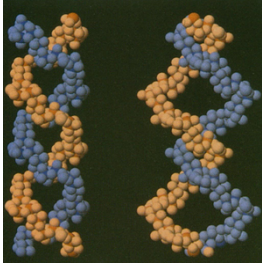 <p>[[CH<sub>3</sub>)<sub>2</sub>NH<sub>2</sub>]K<sub>4</sub>[V<sub>10</sub>O<sub>10</sub>(H<sub>2</sub>O)<sub>2</sub>(OH)<sub>4</sub>(PO<sub>4</sub>)<sub>7</sub>]·4 H<sub>2</sub>O</p>                                        | II | <p><i>Haushalter and Zubieta et al.</i><br/><b>Science</b><br/>1993, 259, 1596-1599</p> |
|  <p>KH<sub>2</sub>[(C<sub>5</sub>H<sub>8</sub>NO<sub>2</sub>)<sub>4</sub>(H<sub>2</sub>O)Cu<sub>3</sub>][BW<sub>12</sub>O<sub>40</sub>]·5H<sub>2</sub>O</p>                                                                     | II | <p><i>Wang and Su et al.</i><br/><b>Angew. Chem. Int. Ed.</b><br/>2005, 44, 1–5</p>     |
|  <p>(bpy)[Zn(4,4-bpy)<sub>2</sub>]<sub>2</sub>[H<sub>4</sub>CIV<sub>16</sub>O<sub>38</sub>]·6H<sub>2</sub>O and<br/>(bpy)[Co(4,4-bpy)<sub>2</sub>]<sub>2</sub>[H<sub>4</sub>CIV<sub>16</sub>O<sub>38</sub>]·6H<sub>2</sub>O</p> | II | <p><i>Peng et al.</i><br/><b>J.Mol.Struct.</b><br/>827, (2007), 50–55</p>               |
|  <p>[Cu<sup>II</sup>(L)<sub>2</sub>(H<sub>2</sub>O)<sub>2</sub>][Cu<sup>I</sup><sub>2</sub>(L)<sub>2</sub>]PMO<sub>12</sub>O<sub>40</sub></p>                                                                                 | II | <p><i>Wang and Su et al.</i><br/><b>Chem. Commun.</b><br/>2007, 4245–4247</p>           |
|  <p>[Cu(H<sub>2</sub>O)<sub>2</sub>]<sub>2</sub>H<sub>2</sub>[Cu<sub>8</sub>(dap)<sub>4</sub>(H<sub>2</sub>O)<sub>2</sub>(α-B-GeW<sub>9</sub>O<sub>34</sub>)<sub>2</sub>]</p>                                                 | II | <p><i>Yang et al.</i><br/><b>Chem. Commun.</b><br/>2008, 570–572</p>                    |
|  <p>[Co(H<sub>2</sub>O)<sub>6</sub>][C<sub>5</sub>H<sub>6</sub>N]H<sub>4</sub>[CoW<sub>12</sub>O<sub>40</sub>]NO<sub>3</sub>·3H<sub>2</sub>O</p>                                                                              | II | <p><i>Ali et al.</i><br/><b>Polyhedron</b><br/>2014, 68, 265–271</p>                    |

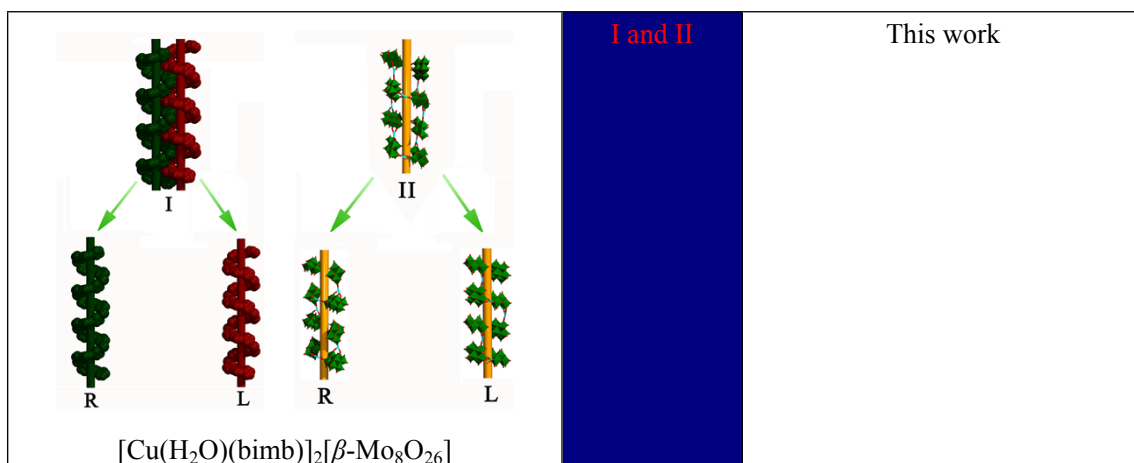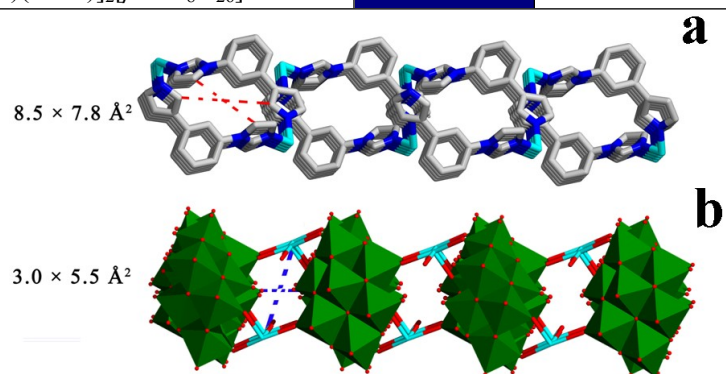

**Fig. S1.** View of the helical channels in **1**: (a) the channels formed by a pair of interweaved right- and left-handed helical chains and (b) the channels formed by a pair of interconnected right- and left-handed helical chains.

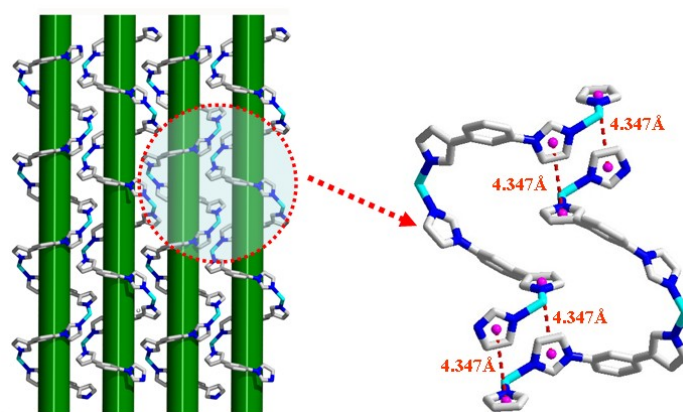

**Fig. S2.** Detailed view of the  $\pi \cdots \pi$  interactions in the inorganic-organic supramolecular layer.

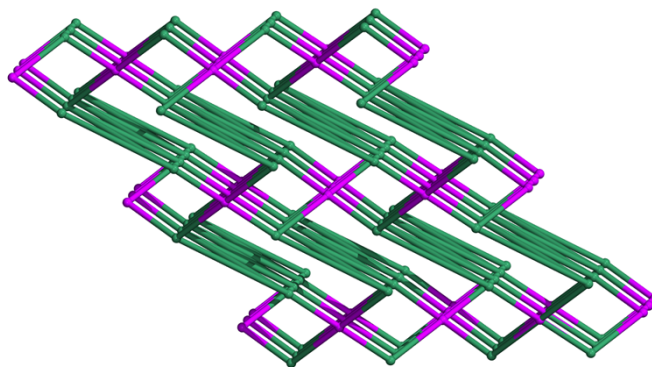

**Fig. S3.** The 3D topology of the network for **1**. Color code:  $\{\beta\text{-Mo}_8\text{O}_{26}\}$ , purple;  $\{\text{Cu}(\text{H}_2\text{O})\text{N}_2\text{O}_3\}$  octahedron, green.

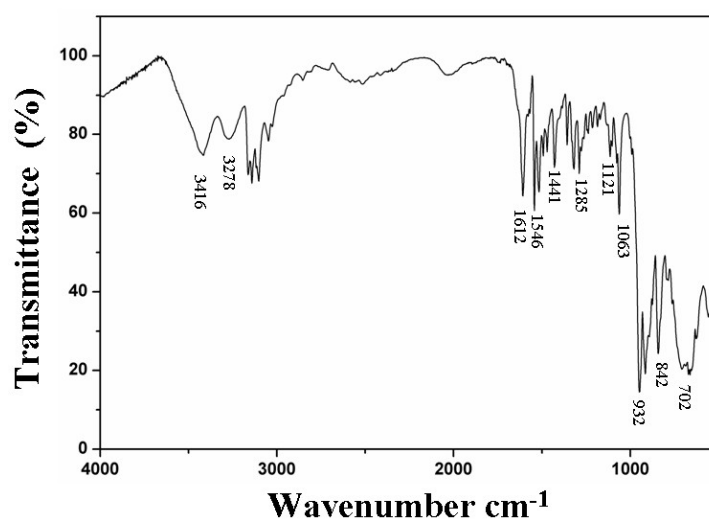

**Fig. S4.** IR spectrum of **1**.

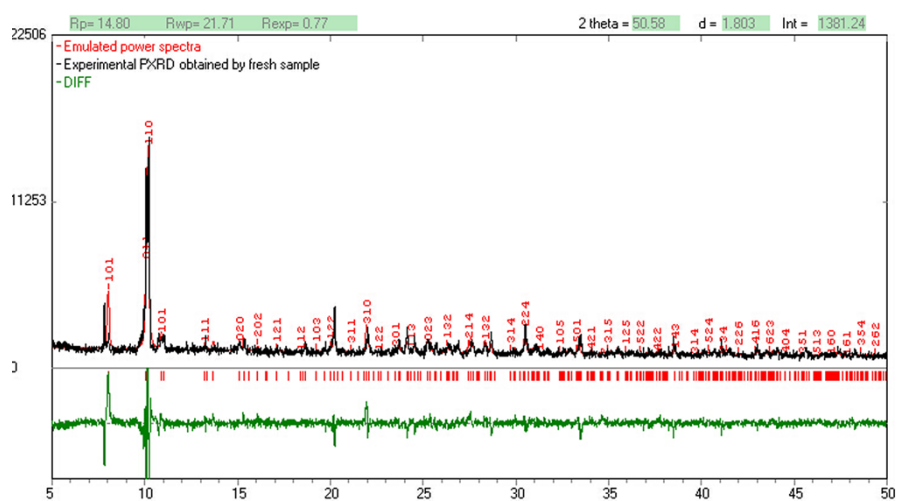

**Fig. S5** Output of a calculated powder X-ray patterns by *POWDER CELL*.
